# Supplementary material
Source: MDPI journal article supplement (https://www.mdpi.com/2075-4442/10/5/79)
Supplement: s1 [file s1]

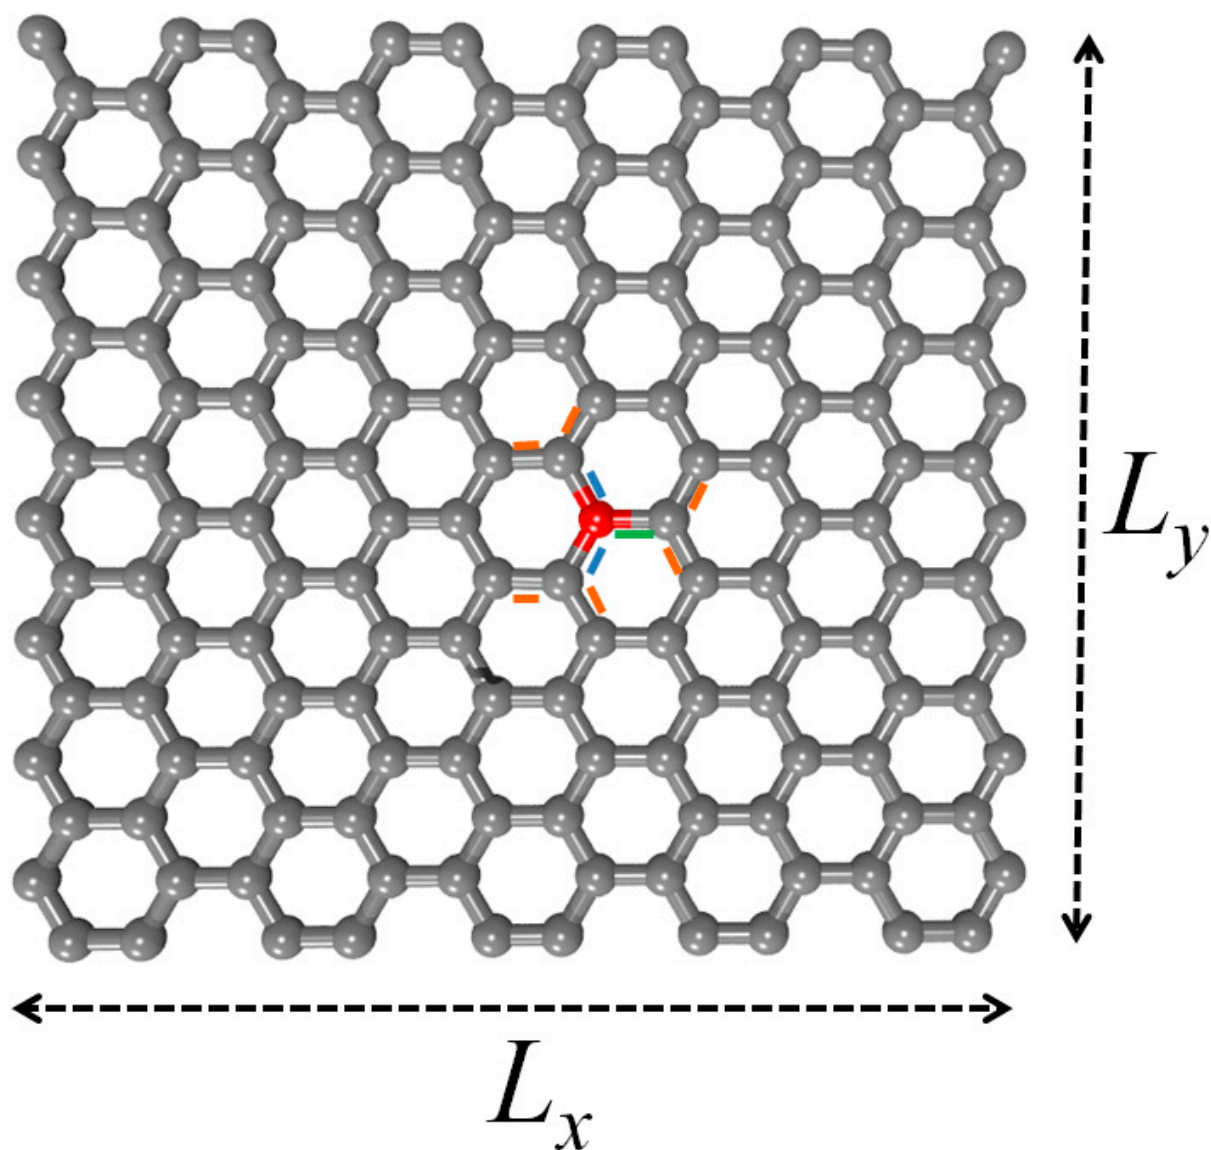

Figure S1. The atomic structure of graphene with substitutional graphitic oxygen ( $G^*$ ). The oxygen is located in one plain with graphene carcass. There are two C–O bond lengths of 1.47 Å (blue line), and one C–O bond length of 1.48 Å. (green line). The C–C bond length near O atoms decreases to 1.40 Å (orange).

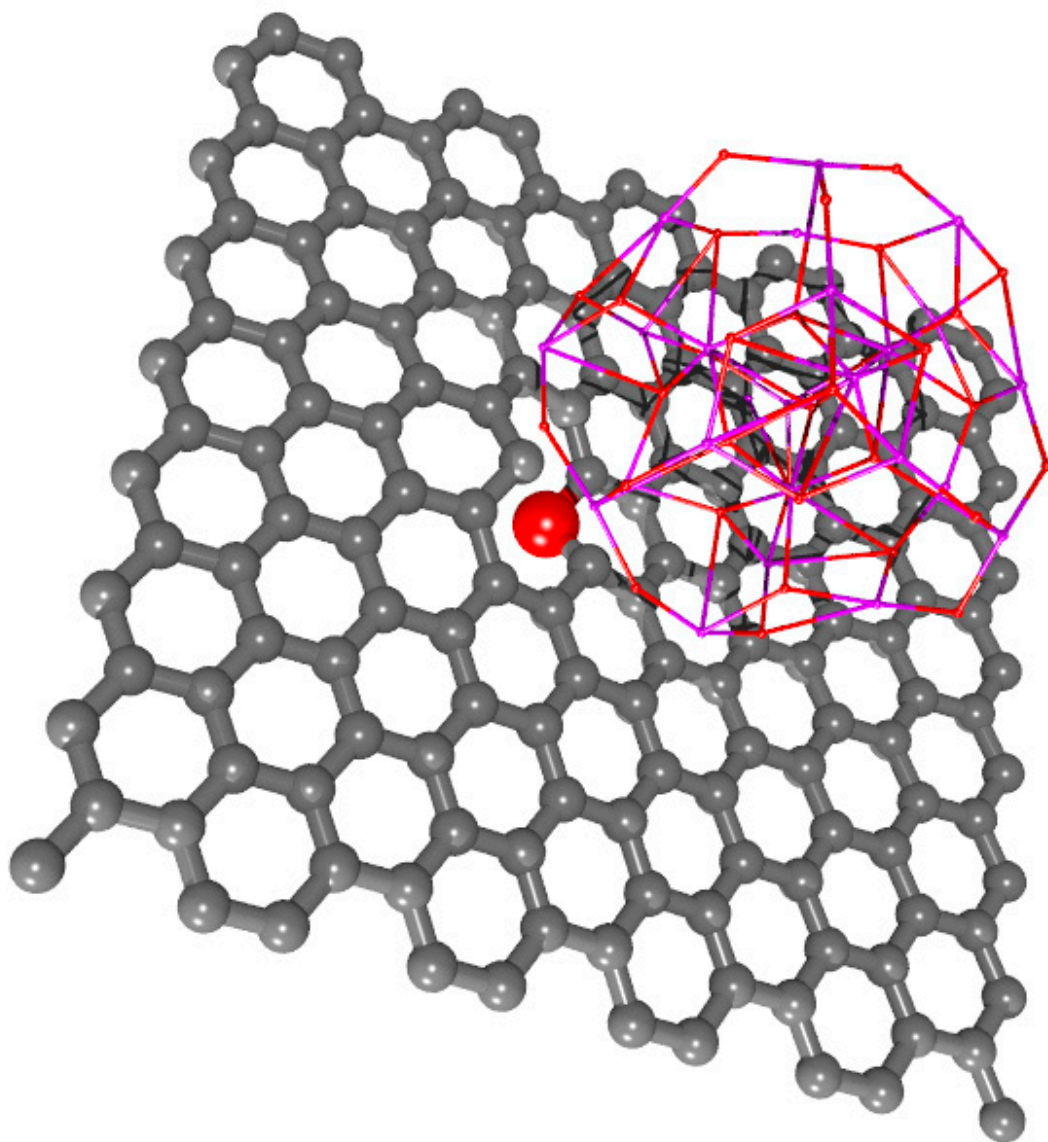

Figure S2. The atomic structure of graphene with substitutional graphitic oxygen after attachment  $\text{Co}_3\text{O}_4$  nanocube. It's seen that one of C–O bonds was broken.

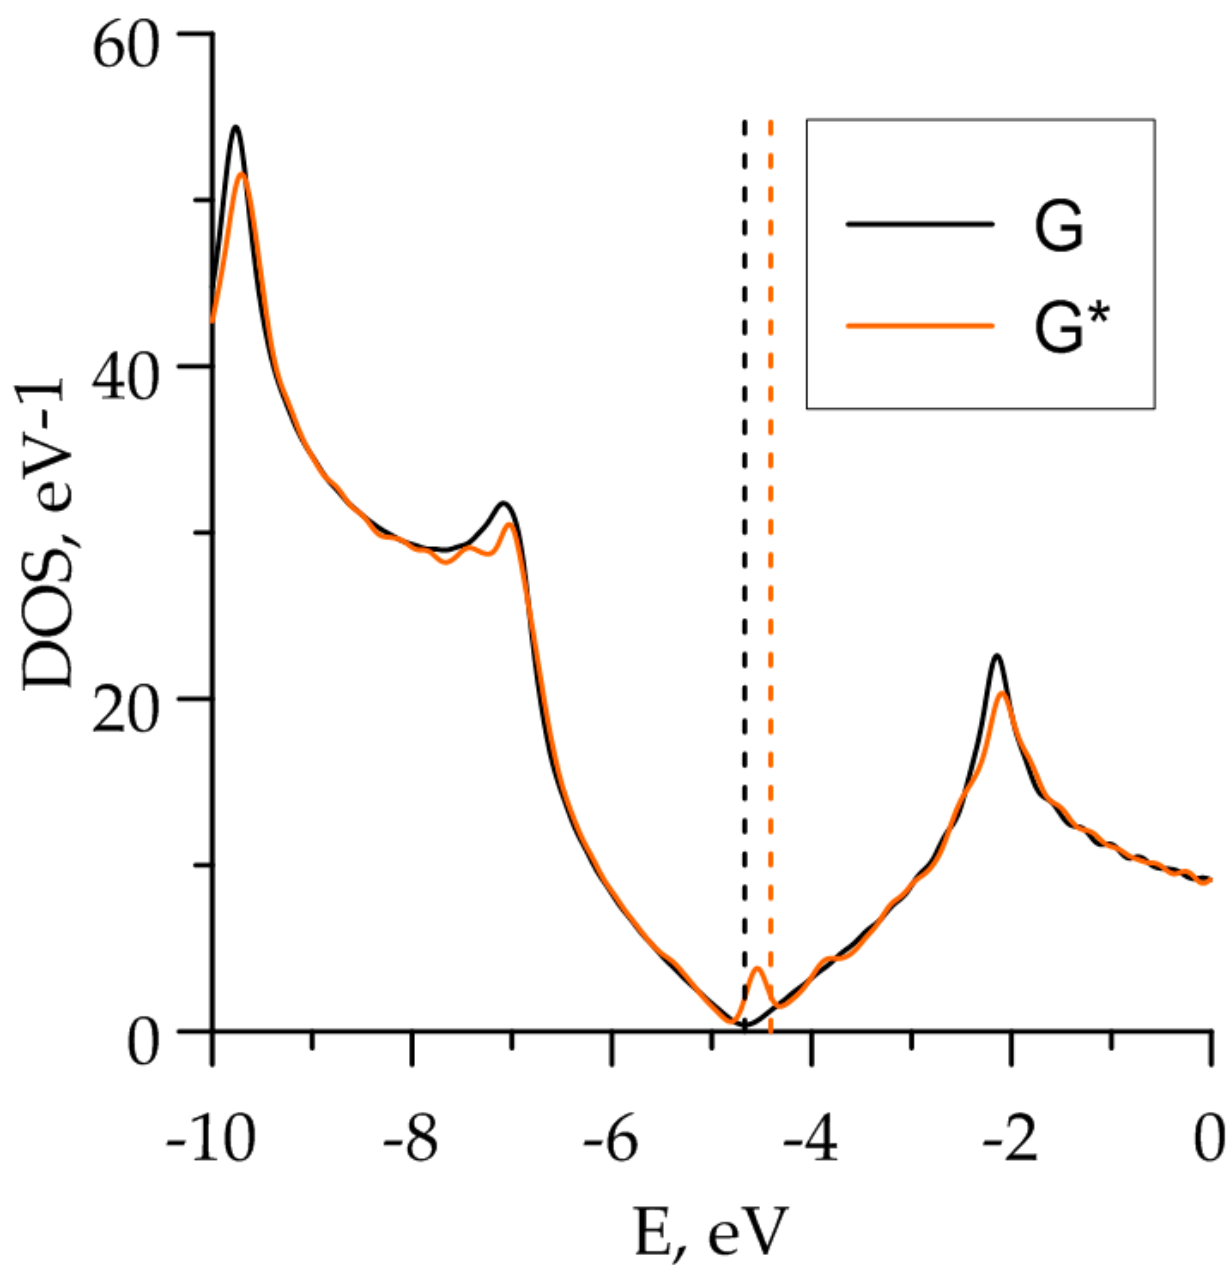

Figure S3. The density of state (DOS) for pure graphene (G) and graphene with substitutional graphitic oxygen (G\*). Dashed lines mark Fermi-level.

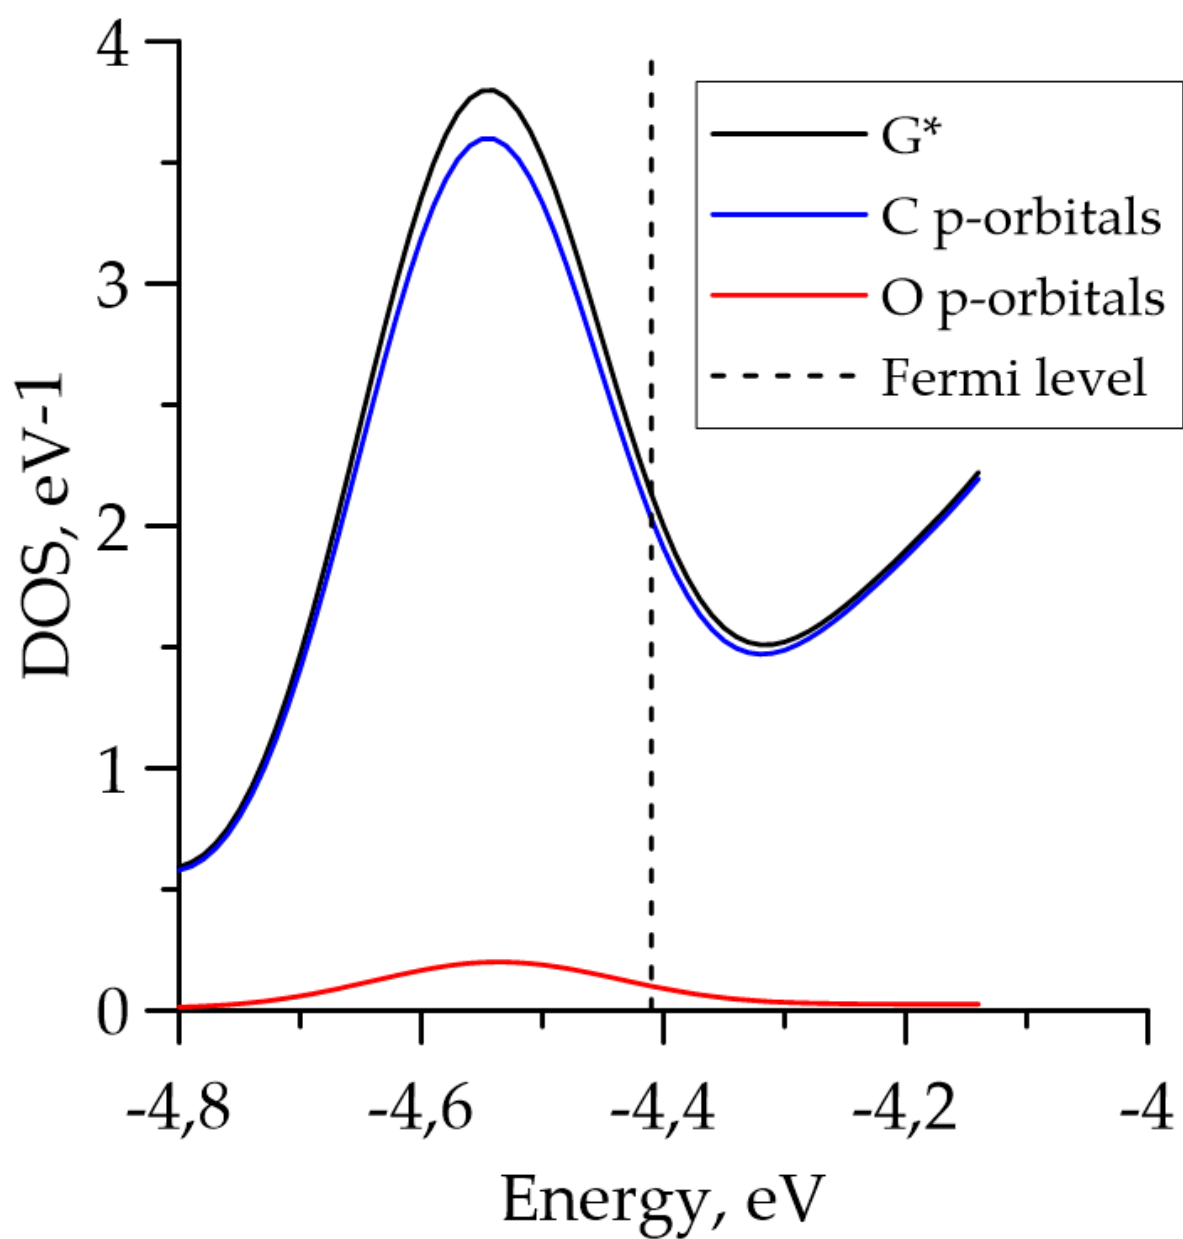

Figure S4. The total density of state (DOS) for graphene with substitutional graphitic oxygen (G\*) and partial DOS (pDOS) for p-orbitals of carbon and oxygen atoms. Dashed line marks Fermi-level.
