# Supplementary material
Source: MDPI journal article supplement (https://www.mdpi.com/2075-4442/10/5/79)
Supplement: s1 [file s1]

Archive with 1 entries (1 files):
- lubricants-1673418-supplementary.pdf
